# Supplementary material for: Effect of Phosphorus Precursor, Reduction Temperature, and Support on the Catalytic Properties of Nickel Phosphide Catalysts in Continuous-Flow Reductive Amination of Ethyl Levulinate
Source: MDPI journal article supplement (doi:10.3390/ijms23031106), 2022-01-20
Supplement: s1 [file s1]

## Supporting information

### Effect of phosphorus precursor, reduction temperature, and support on the catalytic properties of nickel phosphide catalysts in continuous-flow reductive amination of ethyl levulinate

Yazhou Wang <sup>1</sup>, Alexey L. Nuzhdin <sup>2,\*</sup>, Ivan V. Shamanaev <sup>2</sup>, Evgeny G. Kodenev <sup>2</sup>,  
Evgeny Yu. Gerasimov <sup>2</sup>, Marina V. Bukhtiyarova <sup>2</sup> and Galina A. Bukhtiyarova <sup>2</sup>

<sup>1</sup> Novosibirsk State University, Novosibirsk, 630090, Russia

<sup>2</sup> Boreskov Institute of Catalysis SB RAS, Novosibirsk, 630090, Russia

E-mail: anuzhdin@catalysis.ru

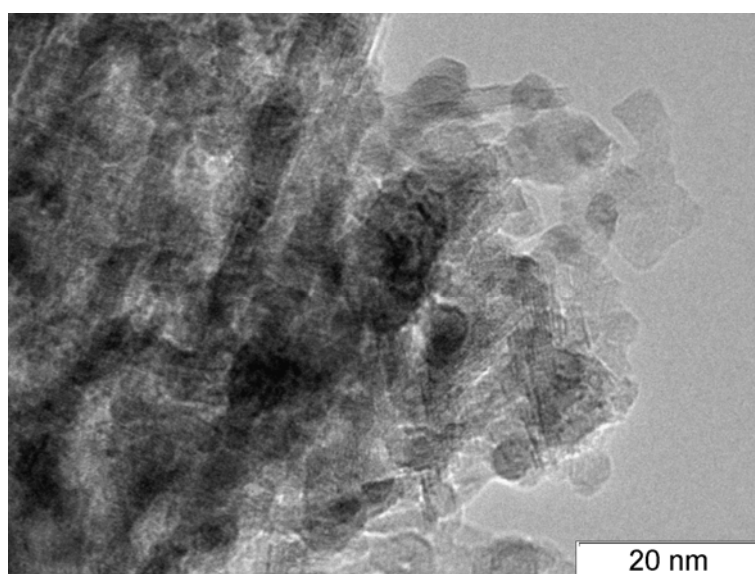

(a)

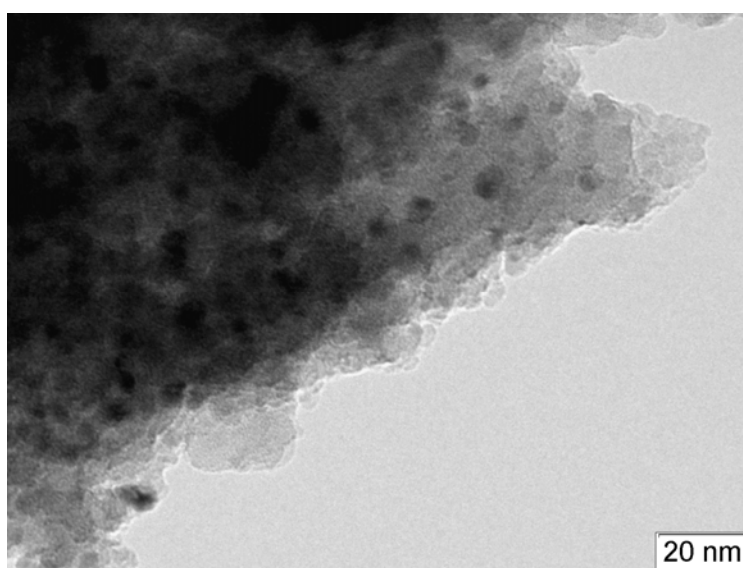

(b)

**Figure S1** TEM data of (a) Ni/Al<sub>2</sub>O<sub>3</sub> and (b) Ni/SiO<sub>2</sub>.

**Table S1.** Physicochemical properties of the supports and diluters.

| Catalyst                         | $S_{BET}$ , m <sup>2</sup> g <sup>-1</sup> | $V_{pore}$ , cm <sup>3</sup> g <sup>-1</sup> | $NH_3$ -TPD, μmol g <sup>-1</sup> |
|----------------------------------|--------------------------------------------|----------------------------------------------|-----------------------------------|
| SiO <sub>2</sub>                 | 300                                        | 0.80                                         | 84                                |
| γ-Al <sub>2</sub> O <sub>3</sub> | 235                                        | 0.79                                         | 421                               |
| SiC                              | 1                                          | –                                            | 0                                 |
| SAPO-11                          | 295                                        | 0.26                                         | 1110                              |
| zeolite β                        | 609                                        | 0.49                                         | 1920                              |
